# Supplementary material for: Biodiversity of Pigmented Fungi Isolated from Marine Environment in La Réunion Island, Indian Ocean: New Resources for Colored Metabolites
Source: PubMed Central journal article supplement (PMC5715948; doi:10.3390/jof3030036), 2017-07-02
Supplement: jof-03-00036-s001.pdf [file jof-03-00036-s001.pdf]

# Biodiversity of Pigmented Fungi Isolated from Marine Environment in La Réunion Island, Indian Ocean: New Resources for Colored Metabolites

Mireille Fouillaud \*, Mekala Venkatachalam, Melissa Llorente, Helene Magalon, Pascale Cuet and Laurent Dufossé

## Appendix A

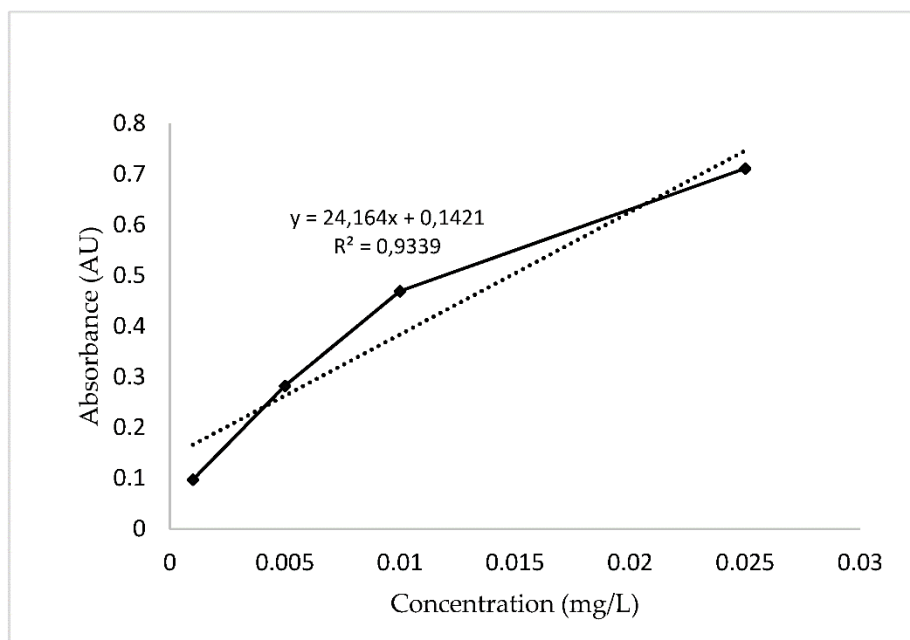

Figure S1. Standard curve for purpurin at 254 nm (- raw data; ..... linear regression)
